# Supplementary material for: Marine Biodiversity in the Atlantic and Pacific Coasts of South America: Knowledge and Gaps
Source: PLoS One. 2011 Jan 31;6(1):e14631. doi: 10.1371/journal.pone.0014631 (PMC3031619; doi:10.1371/journal.pone.0014631)
Supplement: Table S5 — Diversity, state of knowledge, and expertise of all taxonomic groups within the Patagonian Shelf region of South America. Sources of the reports: databases, scientific literature, books, field guides, technical reports. State of knowledge classified as: 5 = very well known (>80% described, identification guides <20 years old, and current taxonomic expertise); 4 = well known (>70% described, identification guides <50 years old, some taxonomic expertise); 3 = poorly known (<50% species described, identification guides old or incomplete, no present expertise within region); 2 = very poorly known (only few species recorded, no identification guides, no expertise); 1 = unknown (no species recorded, no identification guides, no expertise). Taxonomic experts were defined as people with expertise in the description and identification of particular groups of marine species (i.e., taxa). (0.03 MB XLS) [file pone.0014631.s005.xls]

## Sheet: Sheet1
Kingdom	Phylum	Class/ sub class	Order/Family	Described species	Knowledge	N° endemic species	N° undescribed species	N° introduced species	N° Taxonomic experts	N° Identification guides
Animalia	Chordata/Vertebrata	Mammalia	Cetacea	40	4	3	1	0	> 10	6
			Carnivora	5	5	2	0	0	> 10	6
		Aves	Sphenisciformes	7	5	0	0	0	> 10	3
			Podicipediformes	5	5	1	0	0	> 10	3
			Procellariiformes	41	5	0	0	0	> 10	3
			Pelecaniformes	8	5	0	0	0	> 10	3
			Ardeiformes	7	5	0	0	0	> 10	3
			Phoenicopteriformes	1	5	0	0	0	> 10	3
			Anseriformes	19	5	2	0	0	> 10	3
			Gruiformes	4	5	0	0	0	> 10	3
			Charadriiformes	55	5	1	0	0	> 10	3
		Reptilia	Testudines	5	4	0	0	0	> 10	N/A
		Pisces	Albuliformes	2	4	0	0	0	> 5	3
			Anguilliformes	15	4	2	0	0	4	2
			Argentiniformes	5	4	0	0	0	3	4
			Atheriniformes	6	4	3	0	0	> 5	5
			Aulopiformes	14	3	0	0	0	3	2
			Batrachoidiformes	3	3	2	0	0	4	5
			Beloniformes	5	3	0	0	0	4	4
			Beryciformes	5	4	0	0	0	> 5	5
			Carcharhiniformes	24	5	0	0	0	> 10	5
			Chimaeriformes	2	5	1	0	0	3	5
			Clupeiformes	14	4	0	0	0	4	4
			Echinorhiniformes	1	3	0	0	0	> 5	5
			Gadiformes	28	5	26	2	0	5	6
			Gobiesociformes	1	4	0	0	0	> 5	4
			Hexanchiformes	3	5	0	0	0	> 10	6
			Lamniformes	7	5	0	0	0	> 10	5
			Lampriformes	6	4	0	0	0	> 10	4
			Lophiiformes	6	5	0	0	0	> 10	5
			Mugiliformes	2	5	1	0	0	3	4
			Myctophiformes	40	3	0	0	0	> 5	4
			Myxiniformes	8	4	8	0	0	2	2
			Ophidiiformes	5	5	4	0	0	> 5	6
			Orectolobiformes	1	4	0	0	0	4	3
			Osmeriformes	1	3	0	0	0	4	3
			Perciformes	169	4	57	2	0	> 10	8
			Petromyzontiformes	1	5	1	0	0	2	5
			Pleuronectiformes	14	5	1	0	0	3	2
			Polymixiiformes	1	5	0	0	0	4	4
			Pristiformes	1	4	0	0	0	> 5	4
			Rajiformes	46	5	40	0	0	> 5	5
			Salmoniformes	1	5	0	0	0	> 5	4
			Scorpaeniformes	19	5	2	0	0	> 10	6
			Siluriformes	2	4	2	0	0	> 5	5
			Squaliformes	16	5	7	0	0	> 10	6
			Squatiniformes	3	4	3	1	0	> 5	6
			Stephanoberyciformes	4	4	0	0	0	3	4
			Stomiiformes	24	3	0	0	0	> 5	4
			Syngnathiformes	13	3	1	0	0	4	4
			Tetraodontiformes	12	4	0	0	1	> 5	5
			Torpediniformes	4	4	2	0	0	> 5	4
			Zeiformes	5	4	0	0	0	> 10	5
	Tunicata (Urochordata)	Ascidiacea		19	3		?	6	> 30	> 10
		Leptocardii		1	1		?
	Cephalorhyncha	Priapulida		1	1		?
	Mesozoa	Dicyemida		3	1		?
	Echinodermata	Crinoidea		4	1		?
		Asteroidea		80	4		?
		Ophiuroidea		72	4		?
		Echinoidea		20	3		?
		Holothuroidea		31	3		?
	Hemichordata			3	1		?
	Platyhelminthes	Trematoda		24	3		?
		Turbellaria		12	2		?
	Nematodo			95	4		?
	Kinorhyncha			3	1		?
	Tardigrada			1	1		?
	Arthropoda	Chelicerata	Pycnogonida	22	3		?
		Crustacea/Maxillopoda	Branchiura	1	1		?
			Thecostraca	31	3		?	3
			Copepoda	63	4		?	1
			Ostracoda	49	3		?
		Crustacea/Malacostraca	Stomatopoda	1	1		?
			Amphipoda	98	4		?	1
			Cumacea	26	3		?
			Isopoda	104	5		?	5
			Mysidacea	24	3		?
			Nebaleacea	1	1		?
			Tanaidacea	6	1		?
			Decapoda	207	5		?	3
		Branchiopoda		1	1		?
	Branchiopoda (Cladocera)			11	2		?
	Cephalocarida			1	1		?
	Chaetognatha			1	2		?
	Nemertea			11	1		?
	Anelida	Oligochaeta		3	1		?
		Polychaeta		188	5		?	4
				14	2		?
	Sipuncula			2	1		?
	Phoronida			11	2		?
	Mollusca	Aplacophora		4	1		?
		Polyplacophora		42	3		?
		Gastropoda		441	5		?	1
		Cephalopoda		34	3		?
		Bivalvia		313	5		?	2
		Scaphopoda		15	2		?
	Gastrotricha			1	1
	Entoprocta			4	1		?
	Bryozoa (Ectoprocta)	Gymnolaemata		132	5		?	5
		Stenolaemata		11	2		?
	Ctenophora			10	2		?
	Cnidaria (Coelenterates)	Hexacorallia, Anthozoa	Actinaria	72	4		?
		Octocorallia	Alcyonacea (including Gordonacea)	5	1		?
			Penatulacea	7	1		?
		Cubozoa		1	1		?
		Hydrozoa		147	5		?	1
		Ctenophora		10	2		?
		Scyphozoa		16	2		?
	Porifera	Hexactinellida		11	2		?
		Calcarea		11	2		?
		Demospongiae		230	5		?
Protocista	Foraminifera	Granuloreticulosa		15	2		?
Algae	Rhodophyta			145	4	16	aprox 5	3	< 5
	Chlorophyta			59	4	N/A	N/A	N/A	< 5	< 10
	Phaeophyceae			59	3	6	N/A	1	< 5
			TOTAL	3776
