# Supplementary material for: Marine Biodiversity in the Atlantic and Pacific Coasts of South America: Knowledge and Gaps
Source: PLoS One. 2011 Jan 31;6(1):e14631. doi: 10.1371/journal.pone.0014631 (PMC3031619; doi:10.1371/journal.pone.0014631)
Supplement: Table S6 — Diversity, state of knowledge, and expertise of all taxonomic groups within the Brazilian region of South America. Sources of the reports: databases, scientific literature, books, field guides, technical reports. State of knowledge classified as: 5 = very well known (>80% described, identification guides <20 years old, and current taxonomic expertise); 4 = well known (>70% described, identification guides <50 years old, some taxonomic expertise); 3 = poorly known (<50% species described, identification guides old or incomplete, no present expertise within region); 2 = very poorly known (only few species recorded, no identification guides, no expertise); 1 = unknown (no species recorded, no identification guides, no expertise). Taxonomic experts were defined as people with expertise in the description and identification of particular groups of marine species (i.e., taxa). (0.04 MB XLS) [file pone.0014631.s006.xls]

## Sheet: Taxa
Kingdom	Phylum or Class	Class or Order	Order or Family	Described species recorded in Brazil	State of Knowledge	No. Endemic species	No. undescribed species	No. Introduced species	No. Taxonomic experts	No. Identification guides
		Mammalia	Cetacea	43	5					1
Animalia	Chordata		Pinnipeds	7	5
		Aves		130		18 nest in Brazilian Islands				1
		Pisces	Elasmobranchii	139	4					1
			Actinopterygii	1155	4	123	???			2
		Reptilia	Serpentes	0	0	0	0	0	0	0
			Testudines	5
		Urochordata	Ascidiacea	39 (100)
			Thaliacea
		Cephalochordata		3
	Hemichordata	Pterobranchia		none
		Enteropneusta		7
	Echinodermata	Crinoidea		15(+) (+6 fósseis)	2			?	2
		Asteroidea		57(+) (+3 fósseis)	3			?	3
		Ophiuroidea		97(+) (+1 fóssil)	4	?	several	?	9
		Echinoidea		45(+) (+59 fósseis)	3	1	???	?	1
		Holothuroidea		40(+)	3	2	???	?	3
	Chelicerata	Pycnogonida
		Halacaroidea							1
	Crustacea	Decapoda		~801	4	17+	several	1+		3+
		Malacostraca		1308 (+)						3+
		Ostracoda
		Branchiopoda
		Cephalocarida
		Copepoda		120 (+)					4
		Maxillopoda		512 (+)		120
	Tardigrada								2
	Nematoda	Adenophorea	several	225 spp + 86 gen (+++) 192 gen (bacia de Campos)	2	???	???	???	7	1
	Nematomorpha
	Kinorhyncha			1		1				0
	Loricifera					0				0
	Priapulida			1		1
	Chaetognatha			17	2	???	???	???	1	1
	Gastrotricha			48		1				0
	Rotifera
	Micrognathozoa
	Mollusca	Aplacophora
		Polyplacophora
		Monoplacophora
		Gastropoda		1361	3	137		ND	25	7
		Cephalopoda
		Bivalvia
		Scaphopoda		33	2	2		ND	1	1
	Annelida	Polychaeta		987	4	???	???	8	23	5 +1 in preparation
	Pogonophora
	Echiura			9
	Sipuncula			30		1
	Gnathostomulida								0
	Platyhelminthes			45 (~350 marine benthic turbelarians in Brazil)
	Mesozoa			Only record of existance, but no specific record
	Nemertea			40	1
	Phoronida			4
	Brachiopoda			2+
	Bryozoa			284+
	Cnidaria	Anthozoa, Hexacorallia and Octocorallia		173 (+)	4	9	?	3	20	3
		Cubozoa	Carybdeida	4	4	0	0	0	9	1
		Hydrozoa		350 (+)	4	16	??	04?	9	5
		Siphonophora
		Scyphozoa		22	4	1	6?	1	10	2
		Staurozoa		1	4	0	?	0	4	0
	Ctenophora			13	4	0	?	?	2	2
	Myxozoa
	Porifera			350	3		~300-400
	Placozoa			no records	1
Plantae	Algae	Chlorophyta	several	201	0.8				8
		Rhodophyta	several	488	0.8				8
		Phaeophyta	several	106	0.8				8
		Cyanophyta
		Diatomea	several
	Angiospermae	(seagrasses)
	Angiospermae	(mangroves)
Protocista	Foraminifera
	Radiolaria
	Tintinnida
	Ciliophora	Tintinnida	several	83+					1	1 in preparation
	Dinoflagellata
